# Supplementary material
Source: PubMed Central journal article supplement (PMC3129173)

**SUPPLEMENTARY MATERIAL FOR THE PAPER**

**MOLECULAR BASIS FOR THE REDUCED CATALYTIC ACTIVITY OF THE NATURALLY OCCURRING T560M MUTANT OF HUMAN 12/15-LIPOXYGENASE THAT HAS BEEN IMPLICATED IN CORONARY ARTERY DISEASE**

**Kathrin Schurmann, Monika Anton, Igor Ivanov, Constanze Richter<sup>#</sup>, Hartmut Kuhn<sup>+</sup>, Matthias Walther**

<sup>\*</sup>Institute of Biochemistry, University Medicine Berlin - Charité, Monbijoustr. 2, D-10117 Berlin, Germany; <sup>#</sup>Institute of Food Chemistry and Toxicology, Technical University Berlin, Germany

Running head: mutant 12/15-LOX

<sup>+</sup>Address correspondence to: Dr. Hartmut Kuhn, Institute of Biochemistry, University Medicine Berlin - Charité, Oudenarder Str. 16, 13347 Berlin, Germany; Tel. 49-30-450 528040, Fax 49-30-450 528905, e-mail: [hartmut.kuehn@charite.de](mailto:hartmut.kuehn@charite.de)

**Table S1 Partial sequence alignment of LOX isoforms**

| Species and isoform (if known or predicted) | T560 (or S)    | Q294        | N287                                  |
|---------------------------------------------|----------------|-------------|---------------------------------------|
| human 12/15LOX                              | SWVPNAPCTMRLP  | -CSQCHLAAP  | QAQLEKELEGGTLFEADFSLLDGIKAN----VIL    |
| rattus 12/15LOX                             | YWVPNAPCTMRLP  | -CSQCYLAAP  | QAQLNKELQKGTLFADFFLLDGIKAN----VIL     |
| mus musculus 12/15LOX                       | YWVPNAPCTMRLP  | -CSQCYLAAP  | QAQLDEELKKGTLFEADFFLLDGIKAN----VIL    |
| pan troglod. 12/15LOX                       | SWVPNAPCTMRLP  | -CSQCHLAAP  | QAQLEKELEGGTLFEADFSLLDGIKAN----VIL    |
| pongo 12/15LOX                              | SWVPNAPCTMRLP  | -CSQCHLAAP  | QAQLEKELEGGTLFEADFSLLDGIKAN----VIL    |
| macaca 12/15LOX                             | TWVPNAPCTMRLP  | -CSQCYLAAP  | QAQLEKELEGGTLFEADFSLLDGIKAN----VIL    |
| sus scrofa 12/15LOX                         | TWVPNAPCTMRLP  | -CSQCYLAVP  | QAQLEKELQGGTLFEADFSLLDGIKAN----VIL    |
| bos taurus 12/15LOX                         | SWVPNAPCTMRLP  | -CTQCYVAAP  | QAELKELQGGTLFEADFSLLMGIKAN----VIL     |
| equus 12/15LOX                              | AWVPNAPCTMRLP  | -CSQCYLAAP  | QAQLEKELQGGMLFEADFSLLDGIKAN----VIL    |
| canis 12/15LOX                              | TWVPNAPCTMRLP  | -CSQCYLAAP  | QIQLEQELQGGRLFADFFVLLDGIKAN----VIL    |
| oryctolagus 12/15LOX                        | TWVPNAPCTMRLP  | -YCQCYLAAP  | QAQLEKELKAGTLFEADFALLDNIKAN----VIL    |
| oryctolagus 12LOX                           | TWVPNAPCTMRLP  | -YCQCYLAAP  | QAQLEKELKAGTLFEADFALLDNIKAN----VIL    |
| mus musculus 12LOX                          | GWVPNAPCTMRMP  | -GEPQCYLAAP | QAQLEKELKNGSLFEADFILLDGIIPAN----VIR   |
| rattus 12LOX                                | GWVPNAPCTMRMP  | -GEPQCYLAAP | QAQLEKELKDGCLFEADFILLDGIIPAN----VIR   |
| human 12LOX                                 | AWVPNAPCTMRMP  | -GEPQCYLAAP | QAQLEKELQNGSLFEADFILLDGIIPAN----VIR   |
| pan troglod. 12LOX                          | AWVPNAPCTMRMP  | -CRNSDIAWP  | RAQLEKELQ-----VPLLPLPGTVLS----LVV     |
| canis 12LOX                                 | AWVPNAPCTMRMP  | -GEPQCYLAAP | RAQLERELQNGSLFEADFILLDGLPTV----VIR    |
| bos taurus 12LOX                            | AWVPNAPCTMRMP  | -GEPQCYLAAP | RAQLERELQNGSLFEADFILLDGIIPAN----VIR   |
| danio rerio 12LOX                           | AWVPNTFCTMRHP  | -NSPQCYIAAP | TTTLNBEELKKGNI FLVDHAILDGIIPAN----VIR |
| Danio rerio5                                | AWVPNTFCTMRHP  | -NSPQCYIAAP | TTTLNBEELKKGNI FLVDHAILDGIIPAN----VIR |
| rattus 15LOX2                               | VWMPNLPSPMQLP  | -GKPCFSAAP  | GTSLQAELEKGSFLVLDHGILSGVQTN----VIN    |
| mus musculus 8LOX                           | VWMPNLPSPMQLP  | -GKPCFSAAP  | GTSLQAELEKGSFLVLDHGILSGVHTN----ILN    |
| pan troglod. 15LOX2                         | AWMPNLPSPMQLP  | -GKPCFSAAP  | GTSLQAELEKGSFLVLDHGILSGIQTN----VIN    |
| human 15LOX2                                | AWMPNLPSPMQLP  | -GKPCFSAAP  | GTSLQAELEKGSFLVLDHGILSGIQTN----VIN    |
| macaca 15LOX2                               | AWMPNLPSPMQLP  | -GKPCFSAAP  | GTSLQAELEKGSFLVLDHGILSGIHTN----VIN    |
| equus 15LOX2                                | AWMPNLPSPMQLP  | -GRPCFSAAP  | GTSLQAELEKGSFLVLDHGILSGVHTN----VIN    |
| bos taurus 15LOX2                           | AWMPNLPSPMQLP  | -GRPCFSTAP  | GTSLQAELEKGSFLVDYDLLAGVRTN----VIN     |
| canis 15LOX2                                | VWMPNLPSPMQLP  | -GKPCFSAAP  | GTSLQAELEKGSFLVLDHGILCGVRTN----LIN    |
| human 12RLOX                                | AWMPNFPASMRNP  | -GRKHHCAP   | GTCLQAELEKGNIFLADYRIMEGIPTV----ELS    |
| pan troglodyt. 12RLOX                       | AWMPNFPASMRNP  | -GRKHHCAP   | GTCLQAELEKGNIFLADYRIMEGIPTV----ELS    |
| canis 12RLOX                                | AWMPNFPSSMRNP  | -GRKHHCAP   | GTCLQAELEKGNIFLADYRILEGIPTI----ELN    |
| bos taurus 12RLOX                           | AWMPNFPSSMRNP  | -GQKCYHCAP  | GTCLQAELEKGNIFLADYRILEGIPTI----ELN    |
| mus musculus 12RLOX                         | SWMPNFPSSMRNP  | -GQKHHCAP   | GTCLQAELEKGNIFLADYRILDGIPTV----ELN    |
| rattus 12RLOX                               | SWMPNFPSSMRNP  | -GQKHHCAP   | GTCLQAELEKGNIFLADYRILDGIPTV----ELN    |
| equus eLOX3                                 | AWMPNAPSSMRQP  | -GSQCYVAAP  | ATCLQTELERGNIFLADYWILAEVPPVH----CLN   |
| bos taurus eLOX3                            | AWMPNAPSSMRQP  | -GHPQCYVAAP | GTCLQTELERGNIFLADYWILAEVPPVH----CLN   |
| human eLOX3                                 | AWMPNAPSSMRQP  | -GRQCYVAAP  | DTCLQTELERGNIFLADYWILAEAPTH----CLN    |
| canis eLOX3                                 | AWMPNTPSSMRQP  | -GRPCYVAAP  | NTCLQTELERGHIFLADYWILEEAPVH----CLN    |
| mus musculus eLOX3                          | AWMPNAPSSMRQP  | -GLQCYVTAP  | GTCLQTELERGHIFLADYWILAEAPVH----CLN    |
| rattus eLOX3                                | AWMPNAPSSMRQP  | -GRQCYVTAP  | GTCLQTELERGHIFLADYWILAEAPVH----CLN    |
| gallus eLOX3                                | AFLPNAPSSMRHP  | -GRQCYVAAP  | GTTLDKEMKEGRIFIVDYEVLLQGIPTV----TIH   |
| Xenopus tropicalis1                         | AWMPNPGPSTMRKP | -GERQCYLAAP | STTLQAELEKGNIFLADYKILEGIPTV----VIN    |
| Xenopus tropicalis2                         | AWMPNPGPSTMRKP | -GERQCYLAAP | STTLQAELEKGNIFLADYKILEGIPTV----VIN    |
| Xenopus laevis2                             | AWMPNAPSTMRKP  | -GERQCYIAAP | STTLQAELEKGNIFLADYKILEGIPTV----VIN    |
| Xenopus laevis1                             | SWMPNPGPSTMRKP | -GETQCYLAAP | STTLQAELEKGNIFLADYKILEGIPTV----VIN    |
| Ambystoma mexicanum                         | SWMPNPGPSTMRQP | -GKQCYMAAP  | STSLEKELQKGNIFIVDHKMMEGLRAN----VLN    |
| Salmo salar2                                | GWMPNTPFISLQQP | -RKKQCYMAAP | SSSLLRELEQSGTIFLLDYKNLDGLKAN----VIN   |

|                            |               |             |                              |                 |
|----------------------------|---------------|-------------|------------------------------|-----------------|
| Tetraodon nigroviridis2    | GWPNSPISLQOP  | -GKQYLMAP   | VAICLGFAQKGNIFLCLDYKNLDGIKA  | ----TIN         |
| Danio rerio2               | LCIPNTPATMSRP | -GKQTYLSAP  | GSSLDQEMEKGRVYLLDYEVLDQLPA   | ----TVN         |
| Danio rerio3               | LCIPNTPATMSRP | -GKQTYLSAP  | GSSLDQEMEKGRVYLLDYEVLDQLPA   | ----TVN         |
| Danio rerio4               | LCIPNTPATMSRP | -GKQTYLSAP  | GSSLDQEMEKGRVYLLDYEVLDQLPA   | ----TVN         |
| Danio rerio1               | LCIPNTPATMSRP | -GKQTYLSAP  | GSSLDQEMEKGRVYLLDYEVLDQLPA   | ----TVN         |
| bos taurus 5LOX            | SWIPNAPPTMRAP | -CTLOFLAAP  | QLTLEQEIEQGNIFIVDFKLLDGDIDAN | ----KTD         |
| sus scrofa 5LOX            | SWIPNAPPTMRAP | -CTLOFLAAP  | QLTLEQEVEQGNIFIVDFELLDGDIDAN | ----KTD         |
| human 5LOX                 | SWIPNAPPTMRAP | -CTLOFLAAP  | QLSLEQEVQGNIFIVDFELLDGDIDAN  | ----KTD         |
| macaca 5LOX                | SWIPNAPPTMRAP | -CTLOFLAAP  | QLSLEQEVQGNIFIVDFELLDGDIDAN  | ----KTD         |
| equus 5LOX                 | SWIPNAPPTMRAP | -CTLOFLAAP  | -----QGNIFIVDFELLDGDIDAN     | ----KTD         |
| mus musculus 5LOX          | SWIPNAPPTMRAP | -CTLOFLAAP  | QLSLEQEVQGNIFIVDYELLDGDIDAN  | ----KTD         |
| rattus 5LOX                | SWIPNAPPTMRAP | -CTLOFLAAP  | QLSLEQEVQGNIFIVDYELLDGDIDAN  | ----KTD         |
| Mesocricetus auratus       | SWIPNAPPTMRAP | -CTLOFLAAP  | HLSLEQEVQGNIFIVDYELLDGDIDAN  | ----KTD         |
| Xenopus tropicalis3        | SWIPNSPPTMRQP | -CTMOYIAAP  | NLTLEQEIEKGNIFIVNYELLDGISAN  | ----KTD         |
| danio rerio 5LOX           | SWIPNSPPTMRKP | -CTLOFLAAP  | GLTLEELKEGNIFIADYEIMDGVTA    | ----STD         |
| Salmo salar1               | SWIPNAPPTMRKP | -CTLOFLAAP  | EMTLEEEIKAGNIYLADYELMEDISP   | ----STD         |
| Danio rerio6               | AWVPNTPSTMRKP | -STROYLAAP  | GTTLQEELQAGNIYIADYEILEDVQPN  | ----DTD         |
| Danio rerio7               | AWIPNTPSTMRKP | -STROYLAAP  | GTTLQEELKAGNIYIADYEILEDVQPN  | ----DTD         |
| Tetraodon nigroviridis1    | SWVPNTPSTMRRP | -RTQOYIAAP  | GLTLEEEIQAGNIYMADFELLDGVKPN  | ----DTD         |
| Tetraodon nigroviridis3    | SILPNYSLLLRKP | -GKPLHVTGP  | GSSLQDEMOKGNIFLFDKAIMDGAPVR  | ----DYD         |
| Branchiostoma floridae8    | GFVFNAPLSLRP  | -GNFYFAAPL  | --TLSEIEIAGHIYIVDCGILDGLQON  | ----TSR         |
| Branchiostoma floridae10   | SFIPNAPWALMQP | -NVPYFTT--  | --TLRQAVVAGNVYLYADYAILDGLIAG | ----NVN         |
| Branchiostoma floridae9    | TCLPNMPLALRQY | -TEVFYHA--  | GWSLRQEIAGHMYVDCSLMKGLSPN    | ----VLG         |
| Clavularia viridis         | GFTPNAPAILRQP | EADVRYCA--  | --TLKEEIEDGHIYLADFKILEGARC   | ----GGP         |
| Gersemia fruticosa2        | GFTPNAPSILRQP | NADVRYCA--  | --TLQEEIKDGNIYLADFEQLVGA     | ----GGP         |
| Plexaura homomalla1        | GFTPNAPAVLRHP | EADIRYCA--  | --NLDEEIKDGHYIVDFKVLVGA      | ----GGP         |
| Gersemia fruticosa1        | GPHNSPFLMRQP  | -EDKRYIT--  | --TLEKAMKEGLIFITDYKILEGIPTM  | ----DTP         |
| Nematostella vectensis2    | LFMPNAPCCLRHP | KDKERYMA--  | --SLYREMKDGHYIVDYKILEEIPRH   | ----MOG         |
| Myxococcus xanthus         | AFVFNAPLSMRRE | VEERRWAP--  | --TLARALDAKRIFLIDFEILDDIRMY  | ----RKV         |
| Branchiostoma floridae7    | AFPPNYPAFMHGE | -----MTAP   | -----LKNVYKKNLGGPPK          | -----           |
| Nematostella vectensis1    | AFPPNYPAFMRGK | ----RLISKP  | GMTLEEAIAKRIYICNLITLSDIVCR   | ----FN          |
| Branchiostoma floridae1    | GFPPNYPAYLHGQ | ---GRQLCCP  | GRSLDDALQANRIFMVNYKVMEDLDLE  | ----TSD         |
| Trichoplax adhaerens1      | AFPPNYPFMRGK  | ---BKLVNPN  | GFTLDEALAKKRLIFICDLTLMLE     | ----IPV         |
| Trichoplax adhaerens3      | GFPPNYPAFMNGK | ---DKELVHP  | GYTLDDAVSKNKIFLCLDLSMLHSV    | ----PLV         |
| Branchiostoma floridae2    | GFVFNMPLILEGN | ---PRPMCAP  | GLTLQKAIHDKRLYIVDHTIMKGT     | ----SFANTAH     |
| Branchiostoma floridae3    | GFVFNMPLILEGN | ---PRPMCAP  | GLKLDKAIKKRRLYIVDHSIMKITS    | ----SFGNKTA     |
| Branchiostoma floridae5    | GFVFNMPLVLEGE | ---PRPMCAP  | GLKLEDALQKSRLYYVDHTIMGIT     | ----SMANKRT     |
| Branchiostoma floridae4    | GFVFNMPLMLEGN | ---NRPMCAP  | GLSLDGAIAKKRRLYIVDHTDMKIAS   | ----FAS         |
| Branchiostoma floridae6    | AFVFNMPLLEGN  | -----MCA    | -----                        | -----           |
| Aspergillus flavus1        | ---AASGSPRSA  | ---RWTAA    | ---LAVLHQEGRFLANHSYQAAYPKTPG | -----           |
| Aspergillus flavus2        | ARGVGIPSPERGA | ---RWTAA    | ---LAVLHQEGRFLANHSYQAAYPKTPG | -----           |
| Magnaporthe                | -----         | ---RYSA     | -----                        | -----           |
| Botryotinia fuckeliana     | AFVFNKPSALFAP | ---RFGCAS   | ---EGER--QGGLYVQDCSYFRK      | ----FAGVEEGEPLV |
| Sclerotinia sclerotiorum   | AFIPNKPPALFTS | ---RFACAS   | ---EGER--DGGLYVQDCSFRK       | ----FAGVEEGEPLV |
| Aspergillus fumigatus1     | SFVVNKPPCLYTE | ---HRYGCAS  | ---DLRNSCRKSLYMQDYSYFRKA     | ----AAGLDPTAVIK |
| Aspergillus fumigatus2     | SFVVNKPPCLYTE | ---HRYGCAS  | ---DLRNSCRKSLYMQDYSYFRKA     | ----AAGLDPTAVIK |
| Neosartorya fischeri       | SFVVNKPPCLYAE | ---YRYGCAS  | ---DLRNSCRGSLYMQDYSYFREA     | ----AAGLDPTAVIK |
| Aspergillus ochraceus      | -----         | -----       | -----                        | -----           |
| Nectria haematococca       | SFVPAKPPALCTA | GKAERYACAP  | ---SDK-----DILIQDYSYFRKAT    | ----GLKDEENFI   |
| Podospira anserina         | VFVIAKPPCLCSP | -----WGCAA  | ---TIDP---ATLYVQDARNIRRS     | ----LGVENEILF   |
| Pseudomonas aeruginosa1    | TYAPAICAMSAAP | LTGTGFAYAP  | --SLLEAAASRRLYLLDYAELGKLAPSG | -----           |
| Pseudomonas aeruginosa3    | TYAPAICAMSAAP | LTGTGFAYAP  | --SLLEAAASRRLYLLDYAELGKLAPSG | -----           |
| Pseudomonas aeruginosa5    | TYAPAICAMSAAP | LTGTGFAYAP  | --SLLEAAASRRLYLLDYAELGKLAPSG | -----           |
| Pseudomonas aeruginosa2    | TYAPAICAMSAAP | LTGTGFAYAP  | --SLLEAAASRRLYLLDYAELGKLAPSG | -----           |
| Pseudomonas aeruginosa4    | TYAPAICAMSAAP | LTGTGFAYAP  | --SLLEATASRRLYLLDYAELGKLAPSG | -----           |
| Burkholderia thailandensis | TYAPALSALLSAP | LTGIGYSYAP  | --NLVSAANRRLYLLDYVNDGLLATS   | -----SR         |
| Shewanella denitrificans   | SFAPALGTANWCE | QAVDKRVFAP  | --SLAQALKDKRLYIVDYKELSVLVDH  | -----           |
| Photobacterium profundum   | SFAPAVTGAIWCK | QTPEKQVFAP  | --SLAEALAESRVFLLDYHELKVLVDN  | -----           |
| Plesiocystis pacifica1     | SFTPAMPLASYAP | PAGRKYVSPG  | ---LADALAQRVYVADWAPLTA       | ----TAMTPG      |
| Acaryochloris marina1      | TYIPNLPLAGYRP | -DAQKYVYAP  | -DSLQKAGAEGRLYITDYAVLNLL     | ----LEPG        |
| Acaryochloris marina3      | TFVPMPLAGFNE  | REIPKYRYAP  | -ESLQALNDGRVYLYADYQILEE      | ----IDAG        |
| Acaryochloris marina2      | VYTPGMPLAGYQP | PDQKQYISAP  | -DSLQIAITEGRLYIADYAILLAGA    | ----ING         |
| Nostoc punctiforme         | GYAAAIPLAGYLP | PHEQKYLYAP  | -DSLAAAGIEGRLYLADYKILDGA     | ----ING         |
| Synechococcus sp           | SFAPAMPTAGYLP | PEQKQYLYAA  | -DDLERAITEGRLYAVDYALLESV     | ----IEGGT       |
| Cyanothece sp1             | TYVPGFPLARYSP | LVQKQYICAP  | VDSLAEVIESQRLYVSDYGILNSLVNG  | -----           |
| Plesiocystis pacifica2     | AYAPAFPLAQYAP | PAAQKYISAP  | GDTLAAALAEGRFTCDYAGAE        | ----GIVAG       |
| Cyanothece sp2             | AFIPNMPLATYAT | VQTKTIAAP   | --TLAEATAQKGLFITNYKGLAELS    | ----PGRY        |
| Cyanothece sp3             | AFIPNMPLATYAT | VQTKTIAAP   | --TLAEATAQKGLFITNYKGLAELS    | ----PGRY        |
| Microcystis aeruginosa     | AFSPNIPLAGYQS | ---MKTVTAP  | --TIASEAAKGNLFLADYAPLHHL     | ----TLTG        |
| Plesiocystis pacifica3     | SFIPSVSGTAYKA | FGRQRYLSAP  | -LTLEQAVSAKRLYVCDYSMFAG      | ----IEAGE       |
| Shewanella woodyi          | SYLPSVSGTLYAK | HEKQRYPHAP  | -LTLSQAADQGLLYVCDYAMFAG      | ----LKGSE       |
| Nematostella vectensis3    | AYTSPMPTKIYDD | R---MWWPKSF | -APVSMIINDGSVFCVQPEFDNL      | ----PTVPD       |
| Plexaura homomalla2        | GFVFNLPKTYLDD | RREMRGRSAP  | -STFSEMIDAGRVYIVEFSYLYD      | ----LSNVED      |
| Ostreococcus lucimarinus   | SYCPNRPLIMRKP | ---QGYCVEN  | GKTLSELAAGHIFMVYELLEDIKRG    | -----           |

|                          |               |              |                                     |
|--------------------------|---------------|--------------|-------------------------------------|
| Trichoplax_adhaerens2    | TFLPNMPGKIYNV | GRTMMLMSP    | SNTFVDAVQDGRVYVSEFPELGRGIRTSDFEELP  |
| Dictyostelium_discoideum | GFTPNVPGALYMD | KKRGRYISSP   | --SNFQKMLDNGNLYMVDYSIFDDVNYYES----- |
| Branchiostoma_floridae1  | GYPNRPPEMLKPK | --EGKYFYAP   | --TVLELISERRLFIVDYNILRKIPQQ-----    |
| Phytophthora_infestans   | AAPFSAPALYNST | -NKTESKYAP   | DPTVDAAISNHRVVFVQDFSSMGQYTDSE-----  |
| Acaryochloris_marina4    | GDVSYSTIGLWDT | PGKLN RV TGH | DPDLPELGITGALDLMGTSVVSYPNLTTRTRLD   |

**Fig. S1. Expression of human ALOX15 mutants.** ALOX15 species were expressed as his-tag fusion proteins in *E. coli*. After cell disruption the lysis supernatant was purified on an open bed Ni-TED column, LOX protein was eluted with 200 mM imidazole and five fractions (E1, E2...) were collected. Aliquots of the fractions were analyzed by immunoblotting using an anti-his-tag antibody and densitometrically quantified. The factors for achieving the same amount of wild-type enzyme are given.

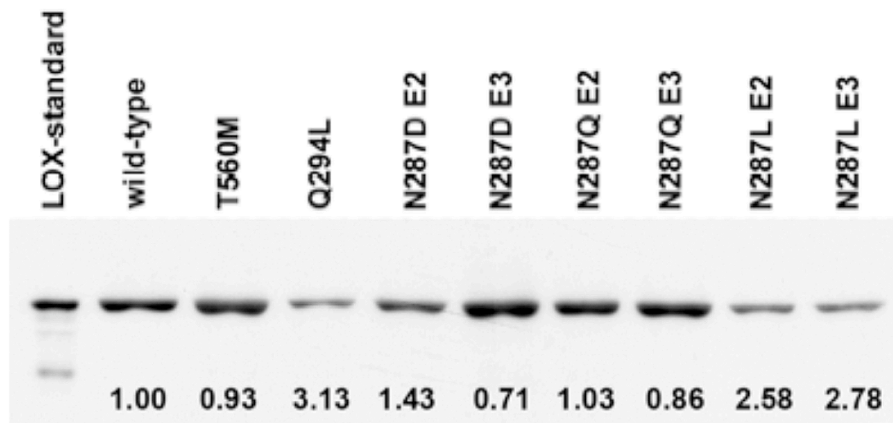

**Fig. S2 Composition of the reaction products formed from arachidonic acid by the Q294L mutant of ALOX15.** Enzyme preparation, activity assays and product analysis were carried out as described in Materials and Methods of the main ms. 4.6  $\mu$ g of purified enzyme were used for this activity assay.

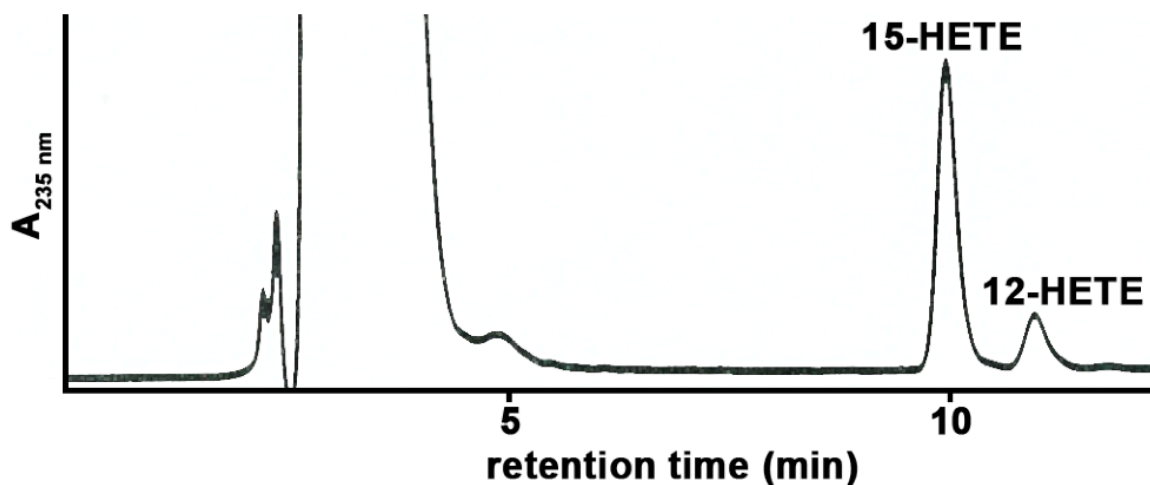

Supplement: supp_M110.211821_jbc.M110.211821-1.pdf [file supp_M110.211821_jbc.M110.211821-1.pdf]
